# Supplementary material for: Lipid interactions and angle of approach to the HIV-1 viral membrane of broadly neutralizing antibody 10E8: Insights for vaccine and therapeutic design
Source: PubMed Central journal article supplement (PMC5338832; doi:10.1371/journal.ppat.1006212), 2017-02-22

**S3 Fig. SPR sensorgrams of 10E8 epitope-scaffolds. T117v2 binding to 10E8 IgG light-chain mutants.**

### 10E8\_Mat

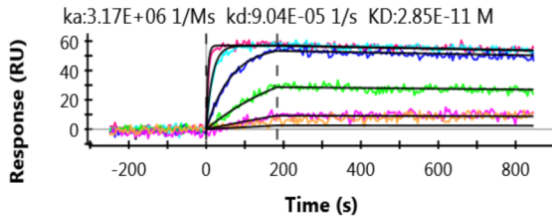

### 10E8\_mut1

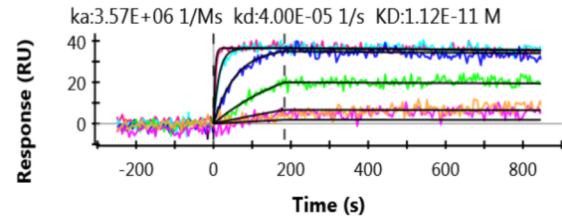

### 10E8\_mut2

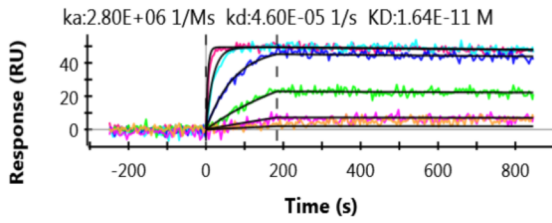

### 10E8\_mut3

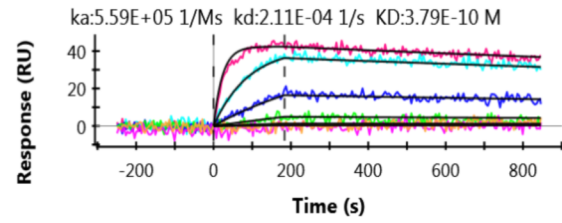

### 10E8\_mut4

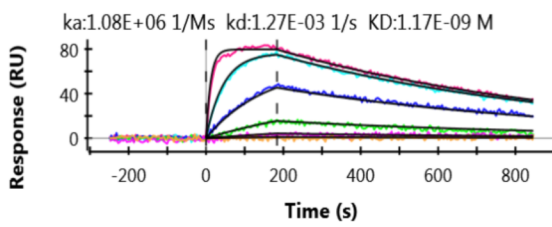

### 10E8\_mut5

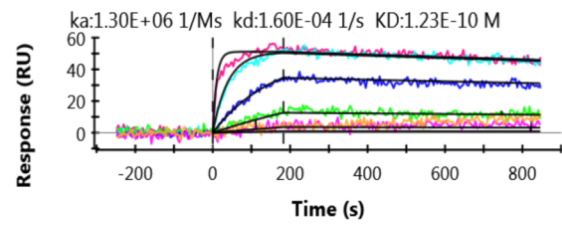

Supplement: ppat.1006212.s003.pdf [file ppat.1006212.s003.pdf]
