# Supplementary material for: Lipid interactions and angle of approach to the HIV-1 viral membrane of broadly neutralizing antibody 10E8: Insights for vaccine and therapeutic design
Source: PubMed Central journal article supplement (PMC5338832; doi:10.1371/journal.ppat.1006212), 2017-02-22

**S4 Fig. Structure comparison of 10E8 mutant 5-T117v2 complex to 10E8 wild type-T117v2.** (A) Snapshot of the superposition of the light-chain regions of 10E8 in mutant 5 (gray) and wild type (beige) showing regions that deviate slightly from each other. The positions of C $\alpha$  atoms of each residue are shown as small spheres for comparison. Despite small variations in position of some light-chain residues, the location and conformation of CDRH3 in the two structures (violet, wild type; green, mutant 5) is nearly identical. The region located in the red dashed rectangle is seen in a close-up in (B) for wild type and (C) for mutant 5. The side chains of the residues are shown as sticks, with residues Asn48<sup>(L)</sup>-Phe53<sup>(L)</sup> adopting multiple conformations. The underlined superscript letters designate the original residues in the 10E8 wild type.

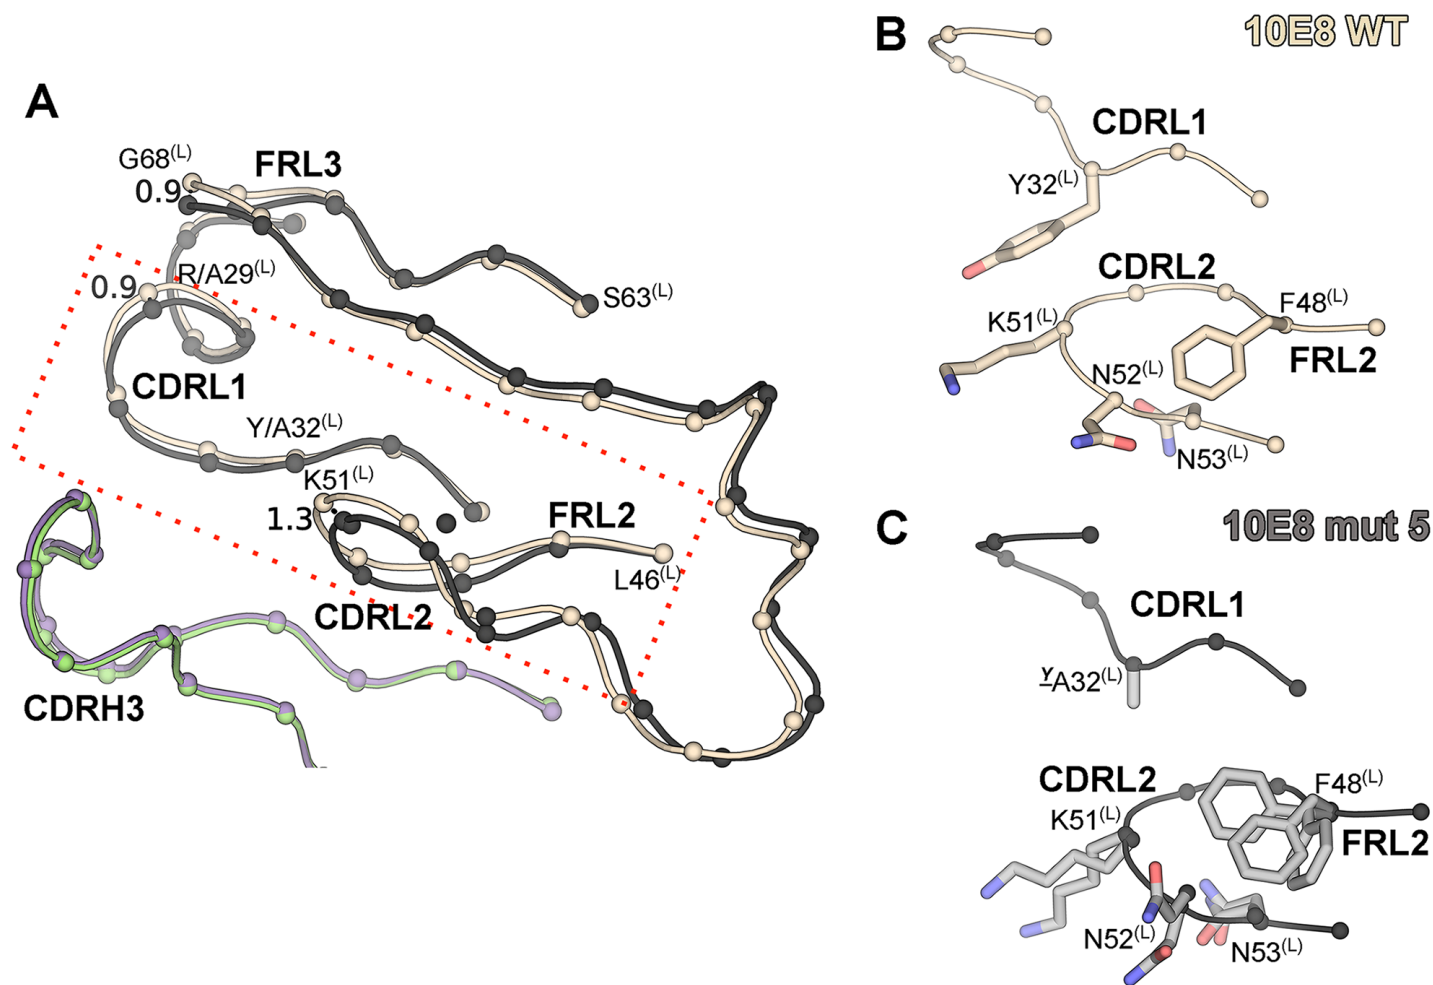

Supplement: ppat.1006212.s004.pdf [file ppat.1006212.s004.pdf]
