# Supplementary material for: Lipid interactions and angle of approach to the HIV-1 viral membrane of broadly neutralizing antibody 10E8: Insights for vaccine and therapeutic design
Source: PubMed Central journal article supplement (PMC5338832; doi:10.1371/journal.ppat.1006212), 2017-02-22

**S6 Fig. SEC-MALS analysis of wild type 10E8 and light chain mutants.** Normalized UV (red) and light scattering (blue) signals of the indicated antibodies were plotted against the elution volume and protein molar masses of the peaks are indicated in black. Wild-type 10E8 and mutant 1 each show three main peaks in the UV traces, all of which have molecular weights of approximately 150 kDa, indicating that all these peaks represent monomeric IgGs. In contrast, only a single peak can be detected for mutants 2, 3 and 5. Although, scattering signals indicate the presence of high-molecular weight aggregates in the wild type 10E8 and mutant 1 sample, the UV analysis shows that only insignificant amounts (<0.5%) of these aggregates are present in either preparation.

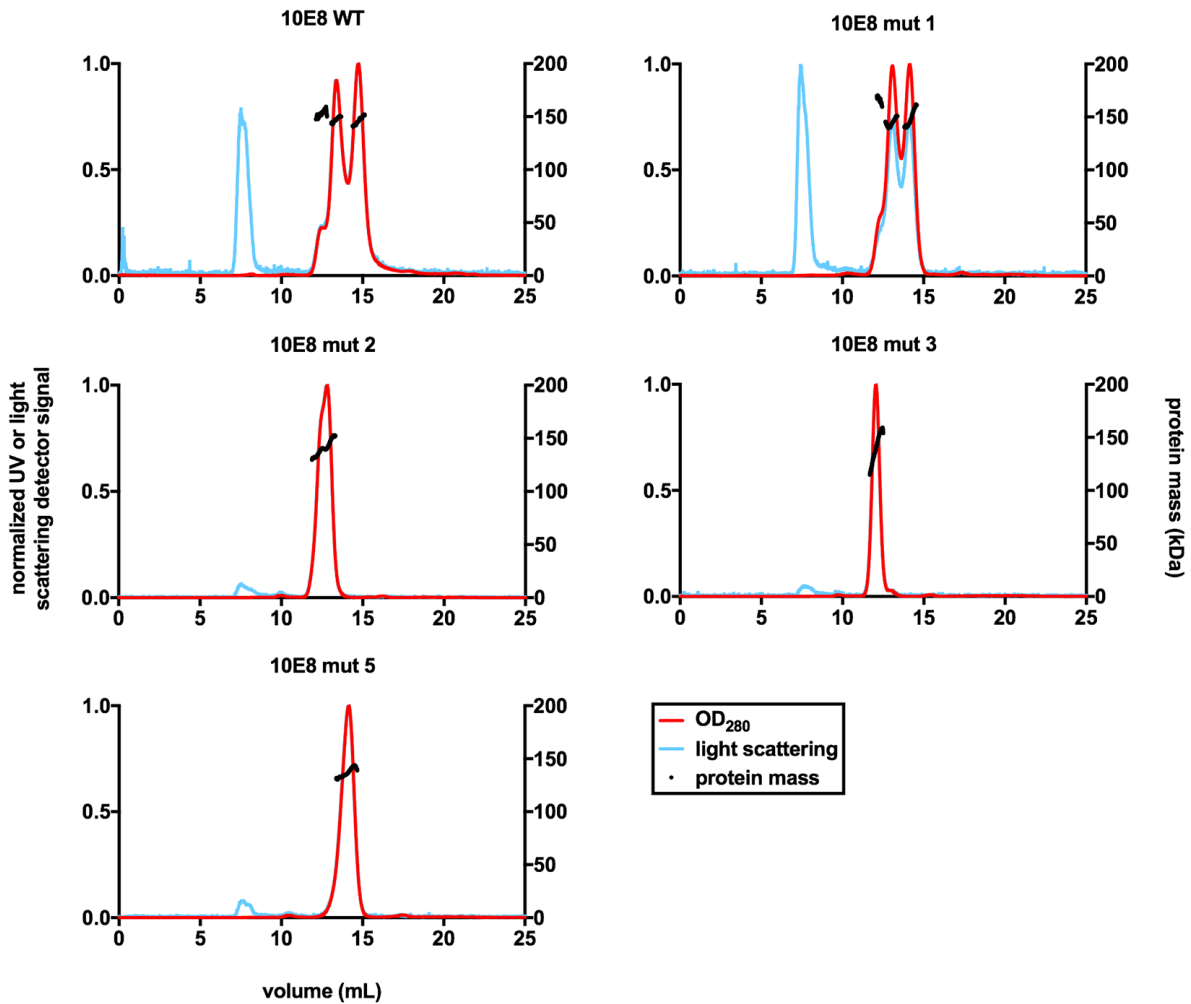

Supplement: ppat.1006212.s006.pdf [file ppat.1006212.s006.pdf]
