# Supplementary material for: Lipid interactions and angle of approach to the HIV-1 viral membrane of broadly neutralizing antibody 10E8: Insights for vaccine and therapeutic design
Source: PubMed Central journal article supplement (PMC5338832; doi:10.1371/journal.ppat.1006212), 2017-02-22
Supplement: ppat.1006212.s007.pdf [file ppat.1006212.s007.pdf]

**S1 Table. X-ray data collection, structure determination and refinement statistics for complexes of 10E8 Fab with T117v2 scaffold alone or co-crystallized with 06:0 PA and 06:0 PG**

| Complex                                                                                          | 10E8 Fab -T117v2-06:0 PG                      | 10E8 Fab -T117v2-06:0 PA                      | 10E8 Fab -T117v2                          |
|--------------------------------------------------------------------------------------------------|-----------------------------------------------|-----------------------------------------------|-------------------------------------------|
| <b>Reservoir condition</b>                                                                       | 50% PEG 200, 0.1 M Hepes pH 7.0               | 50% PEG 400, 0.2M NaCl, 0.1 M CHES pH 9.5     | 0.1 M Hepes pH 7, 15% PEG 20,000          |
| <b>Cryoprotectant</b>                                                                            | as above                                      | as above                                      | + 26% glycerol                            |
| <b>Data collection</b>                                                                           |                                               |                                               |                                           |
| X-ray source                                                                                     | SSRL                                          | SSRL                                          | APS                                       |
| Beam-line                                                                                        | 11-1                                          | 12-2                                          | 23ID-B                                    |
| Detector                                                                                         | Pilatus                                       | Pilatus                                       | MARMOsaic 300                             |
| Wavelength (Å)                                                                                   | 0.97945                                       | 0.97950                                       | 1.03314                                   |
| Temperature (K)                                                                                  | 110                                           | 110                                           | 110                                       |
| No. crystals                                                                                     | 1                                             | 1                                             | 1                                         |
| Space group                                                                                      | P2 <sub>1</sub> 2 <sub>1</sub> 2 <sub>1</sub> | P2 <sub>1</sub> 2 <sub>1</sub> 2 <sub>1</sub> | P2 <sub>1</sub>                           |
| Unit cell ( <i>a</i> , <i>b</i> , and <i>c</i> ; Å)<br>( <i>α</i> , <i>β</i> , and <i>γ</i> ; °) | 55.00, 67.28, 194.67<br>90.0, 90.0, 90.0      | 55.22, 67.26, 196.84<br>90.0, 90.0, 90.0      | 41.10, 158.97, 99.69<br>90.0, 97.98, 90.0 |
| Resolution range (Å)                                                                             | 48.67-2.37                                    | 46.96-2.62                                    | 47.14- 2.10                               |
| Highest resolution shell <sup>a</sup>                                                            | 2.40-2.37                                     | 2.69-2.62                                     | 2.15-2.10                                 |
| No. measurements                                                                                 | 100,173 (5,406)                               | 85,286 (4,009)                                | 171,753 (11,873)                          |
| No. unique reflections                                                                           | 28,788 (1,461)                                | 21,918 (1,055)                                | 72,210 (5,086)                            |
| Redundancy                                                                                       | 3.5 (3.7)                                     | 3.9 (3.8)                                     | 2.4 (2.3)                                 |
| Completeness (%)                                                                                 | 95.7 (98.1)                                   | 97.5 (96.7)                                   | 97.5 (91.9)                               |
| R <sub>sym</sub> <sup>b</sup>                                                                    | 8.6 (70.2)                                    | 7.5 (66.6)                                    | 7.4 (63.0)                                |
| R <sub>rim</sub> <sup>c</sup>                                                                    | 5.2 (40.6)                                    | 4.3 (37.4)                                    | 5.8 (48.1)                                |
| CC <sub>1/2</sub> <sup>d</sup>                                                                   | 91.5 (62.7)                                   | 96.0 (82.2)                                   | 99.7 (74.5)                               |
| Signal to noise ( $\langle I/\sigma \rangle$ )                                                   | 8.5 (1.8)                                     | 9.8 (2.1)                                     | 9.3 (1.6)                                 |
| Solvent content (%)                                                                              | 55.4                                          | 56.4                                          | 51.0                                      |
| <b>Refinement</b>                                                                                |                                               |                                               |                                           |
| No. reflections used for refinement                                                              | 28,737                                        | 21,841                                        | 72,183                                    |
| R <sub>cryst</sub> <sup>d</sup> (%)                                                              | 19.5                                          | 18.4                                          | 17.8                                      |
| R <sub>free</sub> <sup>e</sup> (%)                                                               | 25.0                                          | 24.3                                          | 21.8                                      |
| <b>Model composition (asymmetric unit)</b>                                                       |                                               |                                               |                                           |
| 10E8 Fab                                                                                         | 1                                             | 1                                             | 2                                         |
| T117v2                                                                                           | 1                                             | 1                                             | 2                                         |
| 06:0 PG                                                                                          | 1                                             | n/a                                           | n/a                                       |
| 06:0 PA                                                                                          | n/a                                           | 1                                             | n/a                                       |
| PEG                                                                                              | 2                                             | -                                             | -                                         |
| Glycerol                                                                                         | n/a                                           | n/a                                           | 17                                        |
| HEPES                                                                                            | -                                             | -                                             | 1                                         |
| Waters                                                                                           | 147                                           | 61                                            | 405                                       |
| <b>B-values</b>                                                                                  |                                               |                                               |                                           |
| Wilson plot (Å <sup>2</sup> )                                                                    | 62                                            | 75                                            | 34                                        |
| Mean isotropic (Å <sup>2</sup> )                                                                 | 70                                            | 87                                            | 53                                        |
| Mean isotropic protein/solvent (Å <sup>2</sup> )                                                 | 70 / 69                                       | 86 / 81                                       | 53 / 50                                   |
| Mean isotropic ligand in lipid-binding site (Å <sup>2</sup> )                                    | 106 (06:0 PG)                                 | 134 (06:0 PA)                                 | 59 (glycerol)                             |
| <b>R.m.s.d. from ideal values (Å)</b>                                                            |                                               |                                               |                                           |
| Bond lengths (Å)                                                                                 | 0.008                                         | 0.009                                         | 0.008                                     |
| Bond angles (°)                                                                                  | 1.10                                          | 1.09                                          | 0.88                                      |
| <b>Ramachandran</b>                                                                              |                                               |                                               |                                           |
| Most favored regions (%)                                                                         | 95.5                                          | 96.7                                          | 95.6                                      |
| Additional allowed regions (%)                                                                   | 3.6                                           | 2.4                                           | 3.4                                       |
| Disallowed regions (%)                                                                           | 0.9                                           | 0.9                                           | 1.0                                       |

<sup>a</sup> Values in parentheses correspond to the highest resolution shells

<sup>b</sup>  $R_{sym} = \sum_{hkl} \sum_{j=1,n} \langle |I_{hkl}| - I_{hklj} / \sum_{j=1,n} |I_{hklj}| \rangle$ , where the outer sum (*hkl*) is taken over the unique reflections

<sup>c</sup>  $R_{rim} = \sum_{hkl} [1/(n-1)]^{1/2} \sum_{i=1,n} |I_{hkl}| - \langle I_{hkl} \rangle / \sum_{i=1,n} |I_{hkl}|$

<sup>d</sup> CC<sub>1/2</sub> = Pearson Correlation Coefficient between two random half datasets

<sup>e</sup>  $R_{cryst} = \sum_{hkl} | |F_{o,hkl}| - k|F_{c,hkl}| | / \sum_{hkl} |F_{o,hkl}|$ , where  $|F_{o,hkl}|$  and  $|F_{c,hkl}|$  are the observed and calculated structure factor amplitudes, respectively

<sup>f</sup> R<sub>free</sub>, as for R<sub>cryst</sub>, but for a set of reflections (5% of the total) omitted from refinement

n/a, not applicable
