# Supplementary material for: Lipid interactions and angle of approach to the HIV-1 viral membrane of broadly neutralizing antibody 10E8: Insights for vaccine and therapeutic design
Source: PubMed Central journal article supplement (PMC5338832; doi:10.1371/journal.ppat.1006212), 2017-02-22
Supplement: ppat.1006212.s008.pdf [file ppat.1006212.s008.pdf]

**S2 Table. X-ray data collection, structure determination and refinement statistics for complexes of 10E8 Fab mutants with T117v2**

| Complex                                                                                          | 10E8 Fab mutant 1-T117v2                     | 10E8 Fab mutant 2-T117v2                                        | 10E8 Fab mutant 3-T117v2                    | 10E8 Fab mutant 5-T117v2                   |
|--------------------------------------------------------------------------------------------------|----------------------------------------------|-----------------------------------------------------------------|---------------------------------------------|--------------------------------------------|
| <b>Reservoir condition</b>                                                                       | 0.1 M Hepes pH 7.5, 20% PEG 8000             | 0.2 M Na thiocyanate, 20% PEG 3350, pH 6.9, 10% ethylene glycol | 0.1 M phosphate-citrate pH 4.2, 40% PEG 600 | 0.1 M Hepes pH 7.0, 30% PEG 6000           |
| <b>Cryoprotectant</b>                                                                            | +26% glycerol                                | +26% ethylene glycol                                            | as above                                    | +26% glycerol                              |
| <b>Data collection</b>                                                                           |                                              |                                                                 |                                             |                                            |
| X-ray source                                                                                     | SSRL                                         | APS                                                             | SSRL                                        | APS                                        |
| Beam-line                                                                                        | 12-2                                         | 23ID-B                                                          | 12-2                                        | 23ID-D                                     |
| Detector                                                                                         | Pilatus                                      | MARMOsaic-300                                                   | Pilatus                                     | Pilatus                                    |
| Wavelength (Å)                                                                                   | 0.97950                                      | 1.03320                                                         | 0.97950                                     | 1.03320                                    |
| Temperature (K)                                                                                  | 110                                          | 110                                                             | 110                                         | 110                                        |
| No. of crystals                                                                                  | 1                                            | 1                                                               | 1                                           | 1                                          |
| Space group                                                                                      | P1                                           | C2                                                              | C2                                          | P2 <sub>1</sub>                            |
| Unit cell ( <i>a</i> , <i>b</i> , and <i>c</i> ; Å)<br>( <i>α</i> , <i>β</i> , and <i>γ</i> ; °) | 41.40, 56.59, 64.20<br>101.75, 101.19, 92.16 | 213.49, 63.41, 53.87<br>90.0, 95.79, 90.0                       | 110.88, 66.97, 84.26<br>90.0, 101.46, 90.0  | 40.93, 159.00, 100.61<br>90.0, 95.17, 90.0 |
| Resolution range (Å)                                                                             | 40.49-1.62                                   | 47.24-2.17                                                      | 36.56-2.03                                  | 37.88-2.07                                 |
| Highest resolution shell <sup>a</sup>                                                            | 1.65-1.62                                    | 2.17-2.22                                                       | 2.07-2.03                                   | 2.11-2.07                                  |
| No. measurements                                                                                 | 214,487 (8,100)                              | 151,215 (10,717)                                                | 89,393 (3,001)                              | 158,258 (6,770)                            |
| No. unique reflections                                                                           | 61,518 (2,893)                               | 36,138 (2,687)                                                  | 36,193 (1,667)                              | 73,937 (3,563)                             |
| Redundancy                                                                                       | 3.5 (2.8)                                    | 4.2 (4.0)                                                       | 2.5 (1.8)                                   | 2.1 (1.9)                                  |
| Completeness (%)                                                                                 | 86.9 (82.0)                                  | 94.5 (95.8)                                                     | 92.1 (87.0)                                 | 94.8 (91.4)                                |
| <i>R</i> <sub>sym</sub> <sup>b</sup>                                                             | 8.7 (71.1)                                   | 5.6 (63.5)                                                      | 8.1 (53.5)                                  | 4.9 (45.6)                                 |
| <i>R</i> <sub>rim</sub> <sup>c</sup>                                                             | 5.3 (45.5)                                   | 3.1 (35.6)                                                      | 5.8 (45.9)                                  | 3.9 (38.3)                                 |
| <i>CC</i> <sub>1/2</sub> <sup>d</sup>                                                            | 94.3 (75.3)                                  | 99.9 (83.5)                                                     | 86.1 (58.0)                                 | 95.0 (68.0)                                |
| Signal to noise ( <i>I</i> / <i>σI</i> )                                                         | 9.01 (2.4)                                   | 15.50 (2.1)                                                     | 7.6 (2.5)                                   | 9.2 (2.1)                                  |
| Solvent content (%)                                                                              | 43.9                                         | 55.8                                                            | 49.3                                        | 54.4                                       |
| <b>Refinement</b>                                                                                |                                              |                                                                 |                                             |                                            |
| No. reflections used for refinement                                                              | 61,470                                       | 36,126                                                          | 36,187                                      | 73,905                                     |
| <i>R</i> <sub>cryst</sub> <sup>e</sup> (%)                                                       | 17.2                                         | 16.9                                                            | 17.4                                        | 17.8                                       |
| <i>R</i> <sub>free</sub> <sup>f</sup> (%)                                                        | 21.4                                         | 22.8                                                            | 21.3                                        | 21.6                                       |
| <b>Model composition (asymmetric unit)</b>                                                       |                                              |                                                                 |                                             |                                            |
| 10E8 Fab                                                                                         | 1                                            | 1                                                               | 1                                           | 2                                          |
| T117v2                                                                                           | 1                                            | 1                                                               | 1                                           | 2                                          |
| Glycerol                                                                                         | 4                                            | n/a                                                             | n/a                                         | 7                                          |
| Ethylene glycol                                                                                  | n/a                                          | 1                                                               | n/a                                         | n/a                                        |
| Phosphate                                                                                        | n/a                                          | n/a                                                             | 1                                           | n/a                                        |
| PEG                                                                                              | -                                            | 1                                                               | 1                                           | -                                          |
| Waters                                                                                           | 351                                          | 233                                                             | 144                                         | 209                                        |
| <b>B-values</b>                                                                                  |                                              |                                                                 |                                             |                                            |
| Wilson plot (Å <sup>2</sup> )                                                                    | 22                                           | 41                                                              | 37                                          | 48                                         |
| Mean isotropic (Å <sup>2</sup> )                                                                 | 31                                           | 59                                                              | 54                                          | 70                                         |
| Mean isotropic protein/solvent (Å <sup>2</sup> )                                                 | 30 / 41                                      | 60 / 54                                                         | 54 / 51                                     | 71 / 60                                    |
| Mean isotropic ligand in lipid-binding site (Å <sup>2</sup> )                                    | 56 (glycerol)                                | 43 (water)                                                      | 88 (phosphate)                              | 86 (water)                                 |
| <b>R.m.s.d. from ideal values (Å)</b>                                                            |                                              |                                                                 |                                             |                                            |
| Bond lengths (Å)                                                                                 | 0.006                                        | 0.007                                                           | 0.007                                       | 0.008                                      |
| Bond angles (°)                                                                                  | 1.03                                         | 0.87                                                            | 1.01                                        | 0.87                                       |
| <b>Ramachandran</b>                                                                              |                                              |                                                                 |                                             |                                            |
| Most favored regions (%)                                                                         | 97.1                                         | 95.8                                                            | 96.3                                        | 96.7                                       |
| Additional allowed regions (%)                                                                   | 2.5                                          | 3.3                                                             | 3.0                                         | 2.5                                        |
| Disallowed regions (%)                                                                           | 0.4                                          | 0.9                                                             | 0.7                                         | 0.8                                        |

<sup>a</sup> Values in parentheses correspond to the highest resolution shells

<sup>b</sup>  $R_{sym} = \sum_{hkl} \sum_{j=1, N} |I_{hkl}| - I_{hkl}| / \sum_{hkl} \sum_{j=1, N} |I_{hkl}|$ , where the outer sum (*hkl*) is taken over the unique reflections

<sup>c</sup>  $R_{rim} = \sum_{hkl} [1/(N-1)]^{1/2} \sum_{i=1, N} |I_{hkl}| - \langle I_{hkl} \rangle / \sum_{hkl} \sum_{i=1, N} |I_{hkl}|$

<sup>d</sup> *CC*<sub>1/2</sub> = Pearson Correlation Coefficient between two random half datasets

<sup>e</sup>  $R_{cryst} = \sum_{hkl} ||F_{o,hkl}| - k|F_{c,hkl}| / \sum_{hkl} |F_{o,hkl}|$ , where  $|F_{o,hkl}|$  and  $|F_{c,hkl}|$  are the observed and calculated structure factor amplitudes, respectively

<sup>f</sup> *R*<sub>free</sub>, as for *R*<sub>cryst</sub>, but for a set of reflections (5% of total) omitted from refinement

n/a, not applicable
